# Supplementary material for: Association between septic shock and tracheal injury score in intensive care unit patients with invasive ventilation: a prospective single-centre cohort study in China
Source: HighWire-hosted journal article supplement (doi:10.1136/bmjopen-2023-078763), 2024-05-01
Supplement: bmjopen-2023-078763supp002_data_supplement.pdf [file bmjopen-2023-078763supp002_data_supplement.pdf]

**STable 1 Tracheal injured score**

| Lesion               | Moderate<br>$\leq 2$ lesions | Severe<br>>2lesions | Confluen |
|----------------------|------------------------------|---------------------|----------|
| Hyperemia            | 1                            | 2                   | 3        |
| Ischemia             | 4                            | 5                   | 6        |
| Ulcer                | 7                            | 8                   | 9        |
| Tracheal perforation | 10                           | 10                  | 10       |

For example a patient with severe hyperaemia (2 points), Severe ischemia (5 points) and confluen ulcer (10 points) has a total tracheal injured score of 17 (2+5+10).
