# Supplementary figures and images for: Association between septic shock and tracheal injury score in intensive care unit patients with invasive ventilation: a prospective single-centre cohort study in China
Source: HighWire-hosted journal article supplement (doi:10.1136/bmjopen-2023-078763), 2024-05-01

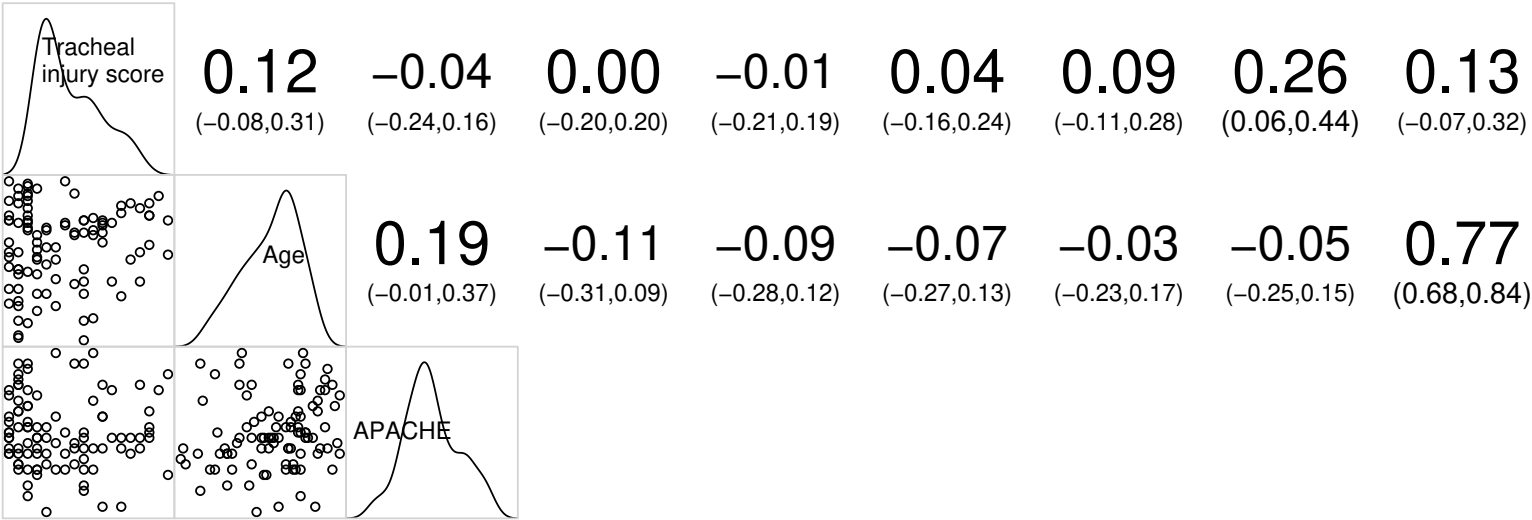

Supplement: bmjopen-2023-078763supp001_data_supplement.pdf [file bmjopen-2023-078763supp001_data_supplement.pdf]
